# Supplementary material for: The Bacterial Markers of Identification of Invasive CovR/CovS-Inactivated Group A Streptococcus
Source: PubMed Central journal article supplement (PMC9603395; doi:10.1128/spectrum.02033-22), 2022-10-06
Supplement: spectrum.02033-22-s0001.pdf [file spectrum.02033-22-s0001.pdf]

- 1 **Supplementary Table S1.** The *emm* type, the phosphorylation CovR (CovR~P), and the expression
- 2 level of SpeB, SLO, and PepO in GAS isolates.

| <b>SPY</b> | <b><i>emm</i> type</b> | <b>CovR~P*</b> | <b>SpeB<sup>#</sup></b> | <b>SLO<sup>#</sup></b> | <b>PepO<sup>#</sup></b> |
|------------|------------------------|----------------|-------------------------|------------------------|-------------------------|
| <b>301</b> | 1                      | +              | +                       | +                      | +                       |
| <b>303</b> | 1                      | +              | +                       | +                      | +                       |
| <b>304</b> | 1                      | +              | +                       | +                      | +                       |
| <b>143</b> | 1                      | -              | -                       | ++                     | ++                      |
| <b>252</b> | 1                      | -              | -                       | ++                     | ++                      |
| <b>261</b> | 1                      | -              | -                       | ++                     | ++                      |
| <b>306</b> | 12                     | +              | +                       | +                      | -                       |
| <b>322</b> | 12                     | +              | +                       | -                      | -                       |
| <b>235</b> | 12                     | -              | -                       | ++                     | ++                      |
| <b>201</b> | 22                     | +              | +                       | -                      | -                       |
| <b>328</b> | 22                     | +              | +                       | -                      | -                       |
| <b>338</b> | 22                     | +              | +                       | -                      | -                       |
| <b>363</b> | 22                     | +              | +                       | +                      | +                       |
| <b>111</b> | 22                     | -              | -                       | ++                     | ++                      |
| <b>138</b> | 22                     | -              | -                       | ++                     | ++                      |
| <b>173</b> | 22                     | -              | -                       | ++                     | ++                      |
| <b>205</b> | 22                     | -              | -                       | ++                     | ++                      |

|            |    |   |   |    |    |
|------------|----|---|---|----|----|
| <b>343</b> | 25 | - | - | ++ | ++ |
| <b>213</b> | 44 | + | + | -  | +  |
| <b>127</b> | 44 | - | - | ++ | ++ |
| <b>132</b> | 44 | - | - | ++ | ++ |
| <b>380</b> | 44 | - | - | ++ | ++ |
| <b>331</b> | 49 | + | + | +  | -  |
| <b>362</b> | 49 | + | + | ++ | ++ |
| <b>337</b> | 49 | - | - | ++ | ++ |
| <b>348</b> | 49 | - | - | ++ | ++ |
| <b>139</b> | 73 | + | + | +  | -  |
| <b>141</b> | 73 | + | + | +  | -  |
| <b>369</b> | 73 | - | - | ++ | ++ |
| <b>315</b> | 78 | - | - | ++ | ++ |
| <b>177</b> | 81 | + | + | -  | -  |
| <b>179</b> | 81 | + | + | -  | -  |
| <b>163</b> | 81 | - | - | ++ | ++ |
| <b>267</b> | 87 | + | + | +  | -  |
| <b>309</b> | 87 | + | + | -  | -  |
| <b>228</b> | 87 | - | - | +  | ++ |

|            |     |   |   |    |    |
|------------|-----|---|---|----|----|
| <b>136</b> | 89  | + | - | +  | -  |
| <b>161</b> | 89  | + | + | +  | -  |
| <b>168</b> | 89  | + | + | -  | -  |
| <b>178</b> | 89  | + | + | -  | -  |
| <b>230</b> | 89  | + | + | -  | -  |
| <b>212</b> | 89  | - | - | ++ | ++ |
| <b>215</b> | 90  | + | + | ++ | +  |
| <b>218</b> | 90  | + | + | +  | +  |
| <b>367</b> | 90  | - | - | ++ | ++ |
| <b>373</b> | 90  | - | - | +  | ++ |
| <b>272</b> | 92  | + | - | +  | -  |
| <b>273</b> | 92  | + | + | +  | +  |
| <b>276</b> | 92  | - | - | ++ | ++ |
| <b>320</b> | 92  | - | - | ++ | ++ |
| <b>317</b> | 102 | + | + | -  | +  |
| <b>319</b> | 102 | + | + | -  | +  |
| <b>323</b> | 102 | + | + | -  | +  |
| <b>116</b> | 102 | - | - | ++ | ++ |
| <b>122</b> | 102 | - | - | +  | ++ |

|            |     |   |   |   |    |
|------------|-----|---|---|---|----|
| <b>233</b> | 102 | - | - | + | ++ |
| <b>326</b> | 102 | - | - | + | ++ |
| <b>340</b> | 113 | + | + | - | -  |
| <b>344</b> | 113 | + | + | - | -  |
| <b>121</b> | 113 | - | - | + | ++ |
| <b>365</b> | 113 | - | - | + | ++ |

3 \*: +, CovR~P positive; -, CovR~P negative

4 #: -, negative; +, low-level expression; ++, high level expression

5 **Supplementary Table S2.** Nucleotide sequence of *covR/covS*, *rocA*, *hasABC* operon, *speB*, *slo*, and  
6 *pepO* in SPY362.

| <b>Gene</b> | <b>Nucleotide change</b>                                         | <b>Amino acid change</b>                          |
|-------------|------------------------------------------------------------------|---------------------------------------------------|
| <i>covR</i> | G108T, A118G                                                     | G33V, K40E                                        |
| <i>covS</i> | A634T                                                            | N212I                                             |
| <i>rocA</i> | A66G                                                             | -                                                 |
| <i>ropB</i> | -                                                                | -                                                 |
| <i>hasA</i> | C96A, C192A                                                      | P33T, P68T                                        |
| <i>hasB</i> | -                                                                | -                                                 |
| <i>hasC</i> | C147T, A539G                                                     | D180G                                             |
| <i>speB</i> | C115A, C378A, C392A, T404A, C406A, C408T,<br>C409A, T410C, T413A | Q39K, D126E, T131N,<br>V135D, P136T, L137T, F138Y |
| <i>slo</i>  | -                                                                | -                                                 |
| <i>pepO</i> | -                                                                | -                                                 |

**Reference strain: NZ131 (NCBI accession No. CP000829.1)**

7

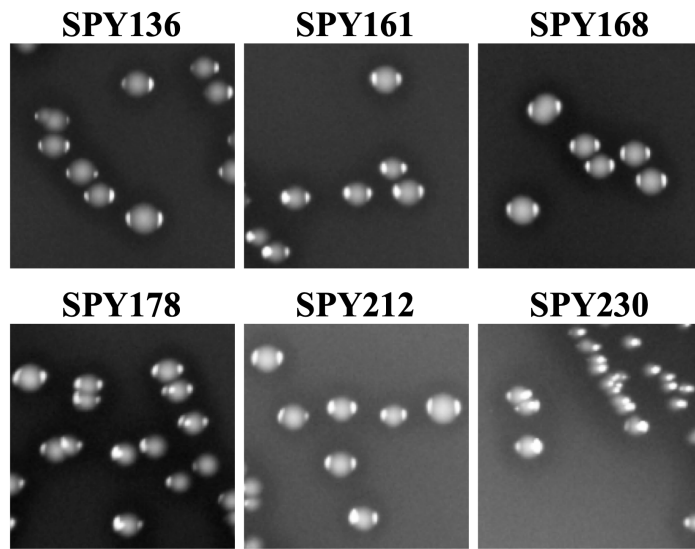

8

9 **Supplementary Figure S1.** The colony morphology of the *emm89* isolates. The *emm89* isolates were  
10 inoculated on the blood agar plate and incubated at 37°C with 5% CO<sub>2</sub> for 16 h. The image was  
11 recorded by the Gel Doc XR+ system (Bio-Rad).

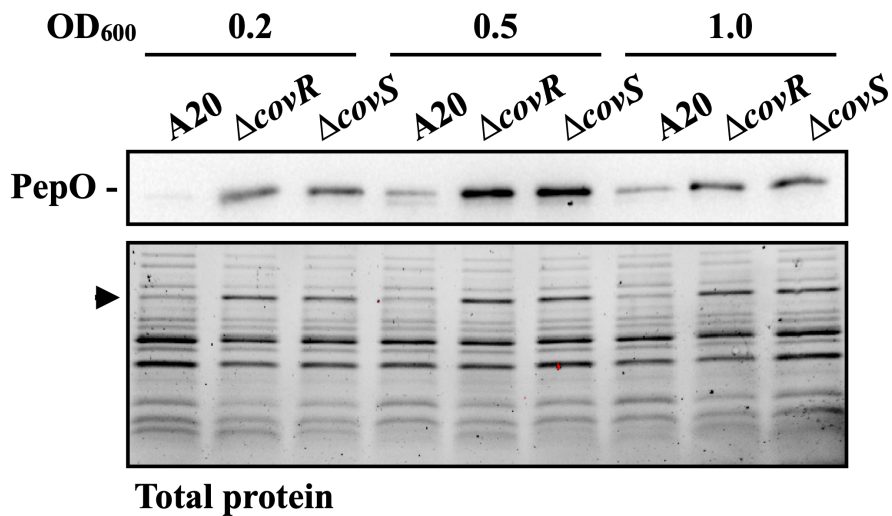

12

13 **Supplementary Figure S2.** The PepO expression in the wild-type A20 strain, the *covR* mutant  
 14 ( $\Delta covR$ ), and *covS* mutant ( $\Delta covS$ ) at different growth phases. GAS strains were cultured to the log  
 15 phase (OD<sub>600</sub> = 0.2), exponential phase (OD<sub>600</sub> = 0.5), and stationary phase (OD<sub>600</sub> = 1.0) and the total  
 16 proteins were extracted for western blot hybridization. The lower panel of images shows total protein  
 17 as the internal loading control. An arrow indicates when a signal from only the CovR/CovS-inactivated  
 18 mutants was identified.

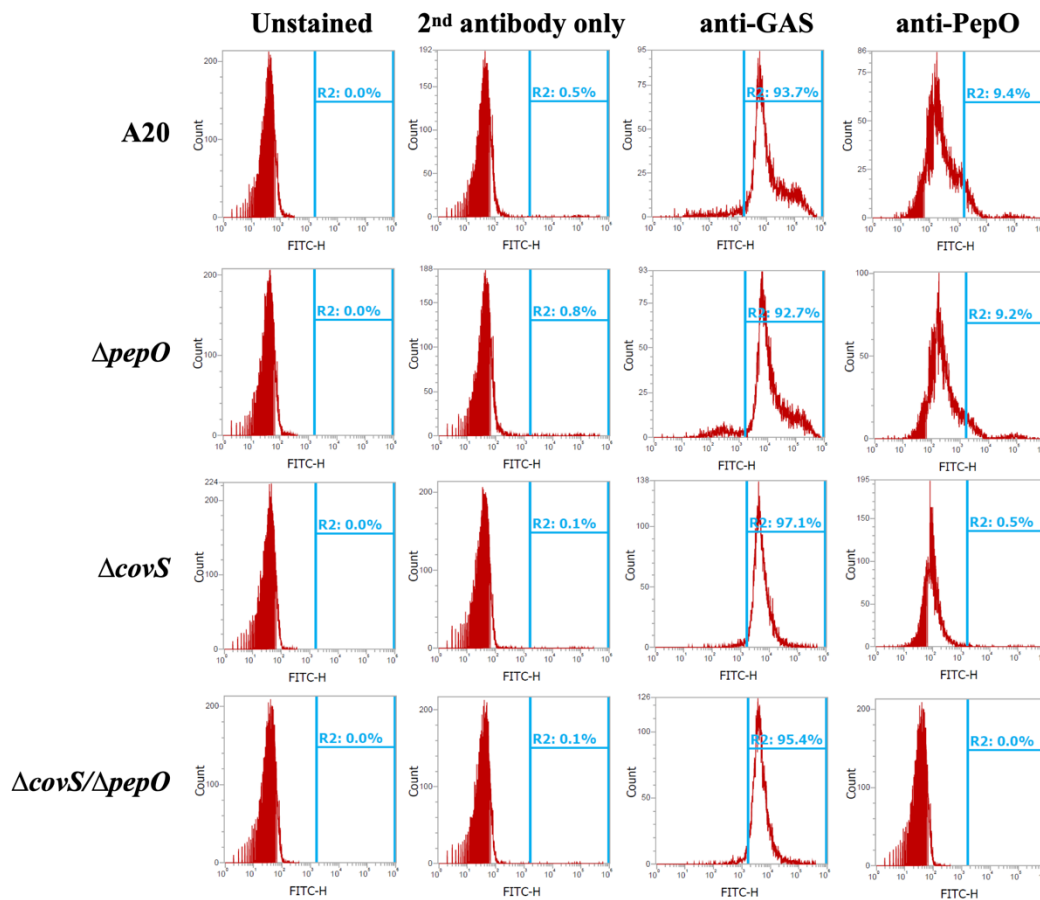

19

20

**Supplementary Figure S3.** Detection of the bacterial surface PepO by using flow cytometry. The

21

exponential phase (OD<sub>600</sub> = 0.6) wild-type A20 strain, its *pepO* mutant ( $\Delta pepO$ ), the *covS* mutant

22

( $\Delta covS$ ), and the  $\Delta covS/\Delta pepO$  mutant were collected and fixed by 3% paraformaldehyde at room

23

temperature for 10 min. The fixed bacterial cells were incubated with the primary antibody (anti-GAS

24

antibody 1.25  $\mu\text{g}/\text{mL}$  or anti-PepO antibody 15  $\mu\text{g}/\text{mL}$ ) at room temperature for 1 h. After removing

25

the primary antibodies, the bacterial cells were incubated with the secondary antibody (anti-rabbit IgG-

26

Alexa-488, 1.875  $\mu\text{g}/\text{mL}$ ) at room temperature for 0.5 h. The signal of PepO on the bacterial surface

27

(total 10,000 bacterial cells) was analyzed by Attune NxT Flow Cytometer (Thermo Fisher Scientific).

28

Unstained and the secondary antibody (2<sup>nd</sup> antibody only) groups were utilized as the negative controls.

29

Bacteria that incubated with anti-GAS antibody was utilized as the positive control.
